# Supplementary material for: Role of intravenous ketamine in the pathogenesis of secondary sclerosing cholangitis in critically ill patients: perpetrator or innocent bystander? Answers provided by forensic toxicology
Source: Springer Nature journal article supplement (doi:10.1007/s00134-023-07257-8), 2023-11-09
Supplement: MOESM1 [file 26283538]

## Supplement:

Role of intravenous ketamine in the pathogenesis of secondary sclerosing cholangitis in critically ill patients: perpetrator or innocent bystander?

Answers provided by forensic toxicology

**Supplementary Table 1 Patient data and results of toxicological analyses.**

| Patient Number                                                                 | 1   | 2   | 3  | 4   | 5   | 6  | 7   | 8   | 9   | 10  |
|--------------------------------------------------------------------------------|-----|-----|----|-----|-----|----|-----|-----|-----|-----|
| <b>Patient data</b>                                                            |     |     |    |     |     |    |     |     |     |     |
| Age (years)                                                                    | 53  | 34  | 58 | 58  | 44  | 61 | 30  | 64  | 59  | 61  |
| Gender                                                                         | f   | m   | m  | m   | m   | m  | m   | f   | m   | m   |
| Cumulative ketamine dose (gram)                                                | 19  | 24  | 6  | 77  | 30  | 26 | 115 | 37  | 148 | 12  |
| <b>ICU day of ...</b>                                                          |     |     |    |     |     |    |     |     |     |     |
| Intubation                                                                     | 1   | 1   | 1  | 1   | 1   | 1  | 1   | 1   | 1   | 1   |
| Cholestasis onset*                                                             | 10  | 7   | 7  | 9   | 3   | 6  | 5   | 2   | 5   | 6   |
| First dose of ketamine                                                         | 11  | 6   | 1  | 1   | 1   | 2  | 5   | 14  | 15  | 2   |
| Last dose of ketamine                                                          | 15  | 28  | 26 | 16  | 11  | 7  | 32  | 50  | 63  | 6   |
| ERC with cast removal                                                          | 59  | 39  | 72 | 290 | 107 | 77 | 257 | 91  | 528 | 106 |
| Cholestasis onset prior to start of ketamine?                                  | yes | no  | no | no  | no  | no | yes | yes | yes | no  |
| Time between last dose of ketamine and cast removal (days)                     | 44  | 11  | 46 | 274 | 96  | 70 | 225 | 41  | 465 | 100 |
| <b>Toxicological analysis of casts<sup>#</sup></b>                             |     |     |    |     |     |    |     |     |     |     |
| Ketamine                                                                       | +++ | +   | -  | +   | -   | -  | -   | -   | -   | -   |
| Norketamine                                                                    | ++  | ++  | +  | -   | -   | -  | +   | -   | -   | -   |
| DHNK                                                                           | -   | +++ | +  | -   | +   | +  | -   | -   | -   | -   |
| <b>Toxicological analysis of cast surrounding aqueous solution<sup>#</sup></b> |     |     |    |     |     |    |     |     |     |     |
| Ketamine                                                                       | +++ | +   | -  | -   | ++  | -  | -   | +   | -   | -   |
| Norketamine                                                                    | ++  | ++  | +  | -   | +   | -  | -   | -   | -   | -   |
| DHNK                                                                           | +   | +++ | +  | -   | +   | +  | +   | -   | -   | -   |

\*Onset of cholestasis according to the recommendations of the European Association for the Study of the Liver, EASL: serum alkaline phosphatase higher than 1.5 times the upper limit of normal (ULN) and  $\gamma$ -glutamyltranspeptidase  $> 3 \times$  ULN [6], <sup>#</sup>relative concentration compared to detection limit: + low, ++ moderate, +++ high, - not detectable, *DHNK* dehydronorketamine, *ERC* endoscopic retrograde cholangiography, *f* female, *ICU* intensive care unit; *m* male.

## Methods

All included patients had been mechanically ventilated for acute respiratory distress syndrome (ARDS), nine of them for COVID-19-associated ARDS and one patient for non-COVID-19 ARDS. For analysis, approximately 30 mg casts and 200  $\mu$ l of the appropriate aqueous medium were extracted using ethyl acetate/dichloromethane (85/15, v/v), evaporated to dryness and reconstituted in 100  $\mu$ l acetonitrile/water (50/50, v/v). Non-target screening for the detection of drugs and pharmaceuticals was accomplished using high-resolution quadrupole time-of-flight analysis (Q-TOF). Additionally, targeted quantification of ketamine was performed by a standard addition approach using LC-tandem mass spectrometry. Method limits of detection (LOD) for ketamine were evaluated by appropriate matrix matched dilutions of sample materials via signal-to-noise ratio (S/N) determination. For the surrounding aqueous solution, a LOD of 7.5 pg/ml was calculated; for casts a LOD of 0.07 pg/mg was determined.
